# Supplementary material for: Long-Term Evaluation of Poly(lactic acid) (PLA) Implants in a Horse: An Experimental Pilot Study
Source: MDPI journal article supplement (doi:10.3390/molecules26237224), 2021-11-29
Supplement: s1 [file s1]

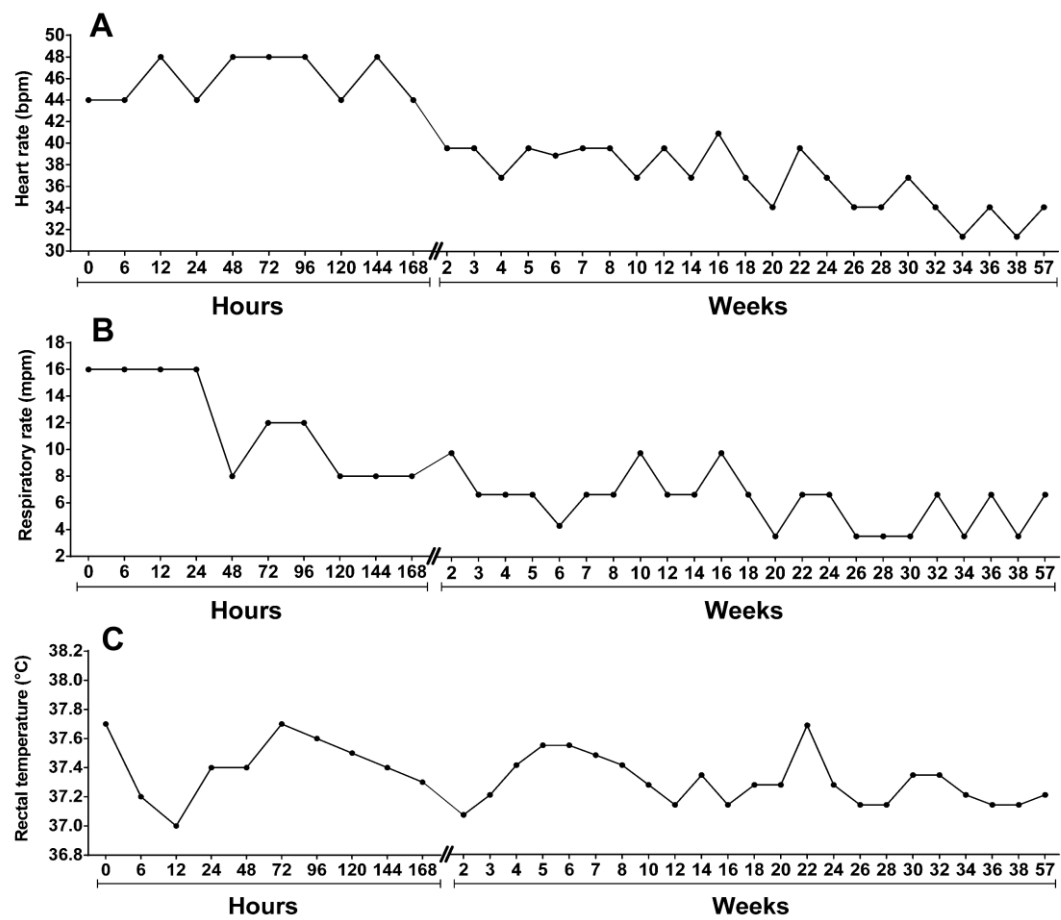

**Figure S1.** Physiological variables of a horse submitted to the implantation of six poly(lactic acid) (PLA) samples. **(A)** Heart rate (HR), **(B)** respiratory rate (RR) and **(C)** rectal temperature (RT).

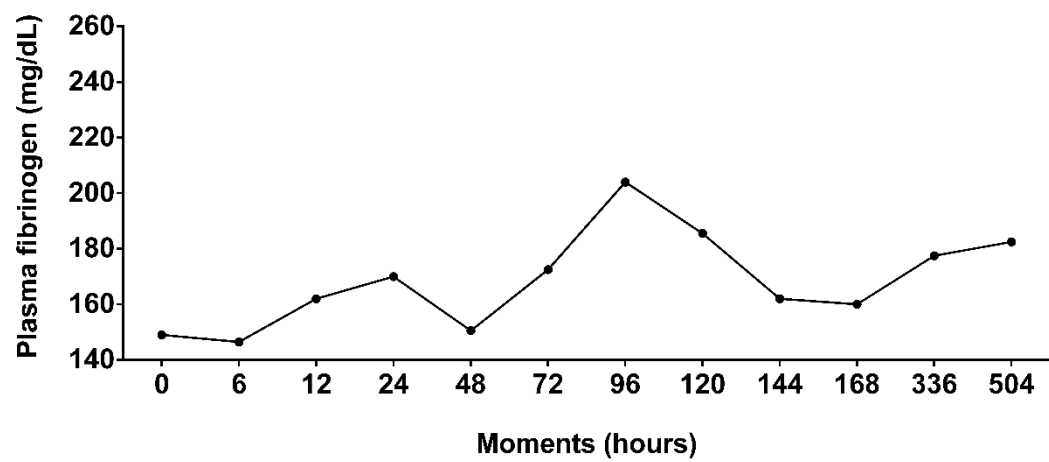

**Figure S2.** Plasma fibrinogen concentration (mg/dL) of a horse submitted to the implantation of six polymers of poly(lactic acid) (PLA).
